# Supplementary material for: The RecQ DNA helicase Rqh1 constrains Exonuclease 1-dependent recombination at stalled replication forks
Source: PubMed Central journal article supplement (PMC4783781; doi:10.1038/srep22837), 2016-03-09
Supplement: srep22837-s1.pdf [file srep22837-s1.pdf]

# The RecQ DNA helicase Rqh1 constrains Exonuclease 1-dependent recombination at stalled replication forks

Fekret Osman, Jong Sook Ahn, Alexander Lorenz and Matthew C. Whitby

**Supplementary Table S1: GpII-induced direct repeat recombination**

| Genotype                       | Nick site <sup>a</sup> | gpII <sup>b</sup> | Strain number | Number of colonies analysed | Ade <sup>+</sup> His <sup>+</sup> recombinant frequency (x 10 <sup>-4</sup> ) <sup>c</sup> |                             | Ade <sup>+</sup> His <sup>-</sup> recombinant frequency (x 10 <sup>-4</sup> ) <sup>c</sup> |                             |
|--------------------------------|------------------------|-------------------|---------------|-----------------------------|--------------------------------------------------------------------------------------------|-----------------------------|--------------------------------------------------------------------------------------------|-----------------------------|
|                                |                        |                   |               |                             | Mean                                                                                       | <i>P</i> value <sup>d</sup> | Mean                                                                                       | <i>P</i> value <sup>d</sup> |
| wild-type                      | -                      | -                 | MCW39         | 15                          | 0.38<br>(+/- 0.19)                                                                         | -                           | 1.30<br>(+/- 0.55)                                                                         | -                           |
| wild-type                      | -                      | +                 | MCW39         | 15                          | 0.53<br>(+/- 0.29)                                                                         | 0.32 <sup>e</sup>           | 1.45<br>(+/- 0.71)                                                                         | 0.58 <sup>e</sup>           |
| wild-type                      | BS                     | -                 | MCW1159       | 18                          | 0.47<br>(+/- 0.21)                                                                         | 0.25 <sup>e</sup>           | 1.81<br>(+/- 0.54)                                                                         | 0.054 <sup>e</sup>          |
| wild-type                      | BS                     | +                 | MCW1159       | 18                          | 7.25<br>(+/- 3.00)                                                                         | <0.001 <sup>e</sup>         | 59.9<br>(+/- 22.4)                                                                         | <0.001 <sup>e</sup>         |
| wild-type                      | TS                     | -                 | JSA267        | 18                          | 0.43<br>(+/- 0.31)                                                                         | 0.42 <sup>e</sup>           | 1.65<br>(+/- 0.88)                                                                         | 0.10 <sup>e</sup>           |
| wild-type                      | TS                     | +                 | JSA267        | 18                          | 9.06<br>(+/- 3.64)                                                                         | <0.001 <sup>e</sup>         | 51.5<br>(+/- 19.6)                                                                         | <0.001 <sup>e</sup>         |
| <i>exo1</i> Δ                  | BS                     | -                 | MCW2209       | 17                          | 0.52<br>(+/- 0.20)                                                                         | 0.46 <sup>f</sup>           | 1.67<br>(+/- 0.58)                                                                         | 0.46 <sup>f</sup>           |
| <i>exo1</i> Δ                  | BS                     | +                 | MCW2209       | 18                          | 18.5<br>(+/- 13.84)                                                                        | 0.003 <sup>g</sup>          | 175.9<br>(+/- 71.1)                                                                        | <0.001 <sup>g</sup>         |
| <i>rqh1</i> Δ                  | BS                     | -                 | MCW2070       | 18                          | 1.13<br>(+/- 0.42)                                                                         | <0.001 <sup>f</sup>         | 6.77<br>(+/- 1.98)                                                                         | <0.001 <sup>f</sup>         |
| <i>rqh1</i> Δ                  | BS                     | +                 | MCW2070       | 18                          | 15.9<br>(+/- 12.6)                                                                         | 0.011 <sup>g</sup>          | 98.0<br>(+/- 53.3)                                                                         | 0.008 <sup>g</sup>          |
| <i>exo1</i> Δ<br><i>rqh1</i> Δ | BS                     | -                 | MCW2202       | 18                          | 0.72<br>(+/- 0.40)                                                                         | 0.027 <sup>f</sup>          | 2.21<br>(+/- 0.95)                                                                         | 0.13 <sup>f</sup>           |
| <i>exo1</i> Δ<br><i>rqh1</i> Δ | BS                     | +                 | MCW2202       | 18                          | 12.9<br>(+/- 9.33)                                                                         | 0.025 <sup>g</sup>          | 207.6<br>(+/- 124.1)                                                                       | <0.001 <sup>g</sup>         |
| <i>rad51</i> Δ                 | BS                     | -                 | MCW1894       | 18                          | 0.03<br>(+/- 0.06)                                                                         | <0.001 <sup>f</sup>         | 6.46<br>(+/- 2.08)                                                                         | <0.001 <sup>f</sup>         |
| <i>rad51</i> Δ                 | BS                     | +                 | MCW1894       | 18                          | 0.12<br>(+/- 0.27)                                                                         | <0.001 <sup>g</sup>         | 899.2<br>(+/- 193.2)                                                                       | <0.001 <sup>g</sup>         |

|                                                  |    |   |         |    |                    |                     |                     |                     |
|--------------------------------------------------|----|---|---------|----|--------------------|---------------------|---------------------|---------------------|
| <i>exo1</i> Δ<br><i>rad51</i> Δ                  | BS | - | MCW3494 | 17 | 0.05<br>(+/- 0.05) | <0.001 <sup>f</sup> | 9.53<br>(+/- 5.13)  | <0.001 <sup>f</sup> |
| <i>exo1</i> Δ<br><i>rad51</i> Δ                  | BS | + | MCW3494 | 18 | 0.14<br>(+/- 0.29) | <0.001 <sup>g</sup> | 240.6<br>(+/- 99.0) | <0.001 <sup>g</sup> |
| <i>rqh1</i> Δ<br><i>rad51</i> Δ                  | BS | - | MCW3492 | 18 | 0.01<br>(+/- 0.02) | <0.001 <sup>f</sup> | 8.23<br>(+/- 4.98)  | <0.001 <sup>f</sup> |
| <i>rqh1</i> Δ<br><i>rad51</i> Δ                  | BS | + | MCW3492 | 18 | 0.08<br>(+/- 0.23) | <0.001 <sup>g</sup> | 233.5<br>(+/- 95.5) | <0.001 <sup>g</sup> |
| <i>exo1</i> Δ<br><i>rqh1</i> Δ<br><i>rad51</i> Δ | BS | - | MCW3496 | 21 | 0.00<br>(+/- 0.01) | <0.001 <sup>f</sup> | 0.27<br>(+/- 0.17)  | <0.001 <sup>f</sup> |
| <i>exo1</i> Δ<br><i>rqh1</i> Δ<br><i>rad51</i> Δ | BS | + | MCW3496 | 18 | 0.01<br>(+/- 0.04) | <0.001 <sup>g</sup> | 80.0<br>(+/- 38.3)  | 0.069 <sup>g</sup>  |

<sup>a</sup> Position of gpII cleavage site: BS (bottom strand = lagging template strand); TS (top strand = leading template strand).

<sup>b</sup> Strains are transformed with the empty pREP81 plasmid (-) or pREP81-NLS-gpII (+) that expresses gpII nickase.

<sup>c</sup> The values in parentheses are the standard deviations about the mean.

<sup>d</sup> *P* values are derived from independent-sample *t*-tests comparing the mean values as indicated.

<sup>e</sup> Compared to the equivalent mean recombinant frequency in wild-type without gpII and its cleavage site.

<sup>f</sup> Compared to the equivalent mean recombinant frequency in wild-type with a bottom strand cleavage site but without gpII.

<sup>g</sup> Compared to the equivalent mean recombinant frequency in wild-type with a bottom strand cleavage site and gpII.

**Supplementary Table S2: UV-induced direct repeat recombination**

| Genotype                       | Strain number | Number of colonies analysed | UV dose (J/m <sup>2</sup> ) | % survival <sup>a</sup> | Ade <sup>+</sup> His <sup>+</sup> recombinant frequency (x 10 <sup>-4</sup> ) <sup>a</sup> |                             | Ade <sup>+</sup> His <sup>-</sup> recombinant frequency (x 10 <sup>-4</sup> ) <sup>a</sup> |                             |
|--------------------------------|---------------|-----------------------------|-----------------------------|-------------------------|--------------------------------------------------------------------------------------------|-----------------------------|--------------------------------------------------------------------------------------------|-----------------------------|
|                                |               |                             |                             |                         | Mean                                                                                       | <i>P</i> value <sup>b</sup> | Mean                                                                                       | <i>P</i> value <sup>b</sup> |
| wild-type                      | MCW429        | 21                          | 0                           | 100                     | 1.34<br>(+/- 0.60)                                                                         | -                           | 3.04<br>(+/- 1.30)                                                                         | -                           |
|                                |               |                             | 80                          | 61.2<br>(+/- 8.8)       | 13.0<br>(+/- 5.2)                                                                          | <0.001 <sup>c</sup>         | 13.1<br>(+/- 5.5)                                                                          | <0.001 <sup>c</sup>         |
|                                |               |                             | 160                         | 12.6<br>(+/- 2.9)       | 29.2<br>(+/- 9.1)                                                                          | <0.001 <sup>c</sup>         | 26.5<br>(+/- 9.2)                                                                          | <0.001 <sup>c</sup>         |
| <i>exoI</i> Δ                  | FO949         | 27                          | 0                           | 100                     | 1.54<br>(+/- 0.60)                                                                         | -                           | 3.18<br>(+/- 0.85)                                                                         | -                           |
|                                |               |                             | 80                          | 50.6<br>(+/- 6.9)       | 12.4<br>(+/- 2.4)                                                                          | <0.001 <sup>c</sup>         | 13.6<br>(+/- 4.2)                                                                          | <0.001 <sup>c</sup>         |
|                                |               |                             | 160                         | 13.1<br>(+/- 5.2)       | 26.0<br>(+/- 8.8)                                                                          | <0.001 <sup>c</sup>         | 24.7<br>(+/- 8.8)                                                                          | <0.001 <sup>c</sup>         |
| <i>rqhI</i> Δ                  | FO911         | 27                          | 0                           | 100                     | 2.30<br>(+/- 1.34)                                                                         | -                           | 11.1<br>(+/- 4.5)                                                                          | -                           |
|                                |               |                             | 20                          | 16.4<br>(+/- 5.2)       | 15.2<br>(+/- 4.7)                                                                          | <0.001 <sup>c</sup>         | 62.6<br>(+/- 17.8)                                                                         | <0.001 <sup>c</sup>         |
|                                |               |                             | 40                          | 4.0<br>(+/- 1.1)        | 65.1<br>(+/- 22.9)                                                                         | <0.001 <sup>c</sup>         | 209.1<br>(+/- 59.9)                                                                        | <0.001 <sup>c</sup>         |
| <i>exoI</i> Δ<br><i>rqhI</i> Δ | FO1098        | 27                          | 0                           | 100                     | 1.45<br>(+/- 0.84)                                                                         | -                           | 3.83<br>(+/- 1.43)                                                                         | -                           |
|                                |               |                             | 20                          | 39.7<br>(+/- 11.3)      | 1.69<br>(+/- 1.05)                                                                         | 0.35 <sup>c</sup>           | 4.76<br>(+/- 2.09)                                                                         | 0.06 <sup>c</sup>           |
|                                |               |                             | 40                          | 8.5<br>(+/- 3.4)        | 2.33<br>(+/- 1.41)                                                                         | 0.008 <sup>c</sup>          | 5.50<br>(+/- 2.02)                                                                         | 0.002 <sup>c</sup>          |

<sup>a</sup> The values in parentheses are the standard deviations about the mean.

<sup>b</sup> *P* values are derived from paired *t*-tests comparing the mean values as indicated.

<sup>c</sup> Compared to the equivalent mean recombinant frequency for 0 J/m<sup>2</sup> UV.

**Supplementary Table S3: *RTS1*-induced direct repeat recombination**

| Genotype                       | <i>RTS1</i> | Strain number | Number of colonies analysed | Ade <sup>+</sup> His <sup>+</sup> recombinant frequency (x 10 <sup>-4</sup> ) <sup>a</sup> |                             | Ade <sup>+</sup> His <sup>-</sup> recombinant frequency (x 10 <sup>-4</sup> ) <sup>a</sup> |                             |
|--------------------------------|-------------|---------------|-----------------------------|--------------------------------------------------------------------------------------------|-----------------------------|--------------------------------------------------------------------------------------------|-----------------------------|
|                                |             |               |                             | Mean                                                                                       | <i>P</i> value <sup>b</sup> | Mean                                                                                       | <i>P</i> value <sup>b</sup> |
| wild-type                      | AO          | MCW4713       | 18                          | 161.4<br>(+/- 19.4)                                                                        | -                           | 114.4<br>(+/- 14.1)                                                                        | -                           |
| <i>exo1</i> Δ                  | AO          | FO1742        | 21                          | 57.1<br>(+/- 11.6)                                                                         | <0.001 <sup>c</sup>         | 51.8<br>(+/- 23.3)                                                                         | <0.001 <sup>c</sup>         |
| <i>rqh1</i> Δ                  | AO          | MCW1447       | 16                          | 270.4<br>(+/- 67.9)                                                                        | <0.001 <sup>c</sup>         | 2806.8<br>(+/- 1044.8)                                                                     | <0.001 <sup>c</sup>         |
| <i>exo1</i> Δ<br><i>rqh1</i> Δ | AO          | FO1762        | 21                          | 44.4<br>(+/- 11.8)                                                                         | <0.001 <sup>c</sup>         | 266.4<br>(+/- 73.6)                                                                        | <0.001 <sup>c</sup>         |

<sup>a</sup> The values in parentheses are the standard deviations about the mean.

<sup>b</sup> *P* values are derived from independent-sample *t*-tests comparing the mean values as indicated.

<sup>c</sup> Compared to the equivalent mean recombinant frequency for wild-type.

**Supplementary Table S4: List of *S. pombe* strains used in this study**

| Strain  | Mating type              | Genotype                                                                                                                        | Source                  |
|---------|--------------------------|---------------------------------------------------------------------------------------------------------------------------------|-------------------------|
| FO656   | <i>h</i> <sup>+</sup>    | <i>ura4-D18 his3-D1 leu1-32 arg3-D4</i>                                                                                         | Lab strain              |
| MCW1019 | <i>h</i> <sup>+</sup>    | <i>rqh1 Δ::kanMx6 ura4-D18 his3-D1 leu1-32 arg3-D4</i>                                                                          | Lab strain              |
| FO951   | <i>h</i> <sup>+</sup>    | <i>exo1 Δ::ura4<sup>+</sup> ura4-D18 his3-D1 leu1-32 arg3-D4</i>                                                                | Lab strain              |
| FO1011  | <i>h</i> <sup>+</sup>    | <i>exo1 Δ::ura4<sup>+</sup> rqh1 Δ::kanMx6 ura4-D18 his3-D1 leu1-32 arg3-D4</i>                                                 | This study              |
| MCW2453 | <i>h</i> <sup>+</sup>    | <i>rqh1<sup>K547A</sup> ura4-D18 leu1-32</i>                                                                                    | ECS218 <sup>a</sup>     |
| MCW2454 | <i>h</i> <sup>+</sup>    | <i>rqh1<sup>K547R</sup> ura4-D18 leu1-32</i>                                                                                    | ECS220 <sup>a</sup>     |
| MCW4029 | <i>h</i>                 | <i>exo1 Δ::ura4<sup>+</sup> rqh1<sup>K547A</sup> ura4-D18 his3-D1 leu1-32 arg3-D4</i>                                           | This study <sup>a</sup> |
| MCW4030 | <i>h</i>                 | <i>exo1 Δ::ura4<sup>+</sup> rqh1<sup>K547R</sup> ura4-D18 his3-D1 leu1-32 arg3-D4</i>                                           | This study <sup>a</sup> |
| MCW3605 | <i>h</i>                 | <i>mat2,3 Δ::LEU2<sup>+</sup> rqh1 Δ::kanMx6 ura4-D18 leu1-32 arg3-D4</i>                                                       | This study <sup>b</sup> |
| MCW3664 | <i>h</i>                 | <i>mat2,3 Δ::LEU2<sup>+</sup> ura4-D18 leu1-32 arg3-D4</i>                                                                      | This study <sup>b</sup> |
| MCW3665 | <i>h</i>                 | <i>mat2,3 Δ::LEU2<sup>+</sup> ura4-D18 leu1-32 arg3-D4</i>                                                                      | This study <sup>b</sup> |
| MCW3666 | <i>h</i>                 | <i>mat2,3 Δ::LEU2<sup>+</sup> rqh1 Δ::kanMx6 ura4-D18 leu1-32 arg3-D4</i>                                                       | This study <sup>b</sup> |
| MCW3667 | <i>h<sup>-smf0</sup></i> | <i>mat2,3 Δ::LEU2<sup>+</sup> ura4-D18 leu1-32 arg3-D4</i>                                                                      | This study <sup>c</sup> |
| MCW3668 | <i>h<sup>-smf0</sup></i> | <i>mat2,3 Δ::LEU2<sup>+</sup> ura4-D18 leu1-32 arg3-D4</i>                                                                      | This study <sup>c</sup> |
| MCW3669 | <i>h<sup>-smf0</sup></i> | <i>mat2,3 Δ::LEU2<sup>+</sup> rqh1 Δ::kanMx6 ura4-D18 leu1-32 arg3-D4</i>                                                       | This study <sup>c</sup> |
| MCW3670 | <i>h<sup>-smf0</sup></i> | <i>mat2,3 Δ::LEU2<sup>+</sup> rqh1 Δ::kanMx6 ura4-D18 leu1-32 arg3-D4</i>                                                       | This study <sup>c</sup> |
| MCW39   | <i>h</i>                 | <i>ura4-D18 leu1-32 his3-D1 ade6-L469/pUC8/his3<sup>+</sup>/ade6-M375</i>                                                       | Lab strain              |
| MCW1159 | <i>h</i>                 | <i>ura4-D18 leu1-32 his3-D1 ade6-L469/pUC8/his3<sup>+</sup>/BS nick site/ade6-M375</i>                                          | This study              |
| JSA267  | <i>h</i>                 | <i>ura4-D18 leu1-32 his3-D1 ade6-L469/pUC8/his3<sup>+</sup>/TS nick site/ade6-M375</i>                                          | This study              |
| MCW2391 | <i>h</i>                 | <i>rad50S ura4-D18 leu1-32 his3-D1 ade6-L469/pUC8/his3<sup>+</sup>/BS nick site/ade6-M375</i>                                   | This study              |
| MCW2393 | <i>h</i>                 | <i>rad50S ura4-D18 leu1-32 his3-D1 ade6-L469/pUC8/his3<sup>+</sup>/TS nick site/ade6-M375</i>                                   | This study              |
| MCW2746 | <i>h</i>                 | <i>rad50S cdc10-V50 ura4-D18 leu1-32 his3-D1 ade6-L469/pUC8/his3<sup>+</sup>/BS nick site/ade6-M375</i>                         | This study              |
| MCW2070 | <i>h</i>                 | <i>rqh1 Δ::kanMx6 ura4-D18 leu1-32 his3-D1 ade6-L469/pUC8/his3<sup>+</sup>/BS nick site/ade6-M375</i>                           | This study              |
| MCW2202 | <i>h</i> <sup>+</sup>    | <i>rqh1 Δ::kanMx6 ura4-D18 leu1-32 his3-D1 ade6-L469/pUC8/his3<sup>+</sup>/BS nick site/ade6-M375</i>                           | This study              |
| MCW2209 | <i>h</i> <sup>+</sup>    | <i>exo1 Δ::ura4<sup>+</sup> ura4-D18 leu1-32 his3-D1 ade6-L469/pUC8/his3<sup>+</sup>/BS nick site/ade6-M375</i>                 | This study              |
| MCW1894 | <i>h</i> <sup>+</sup>    | <i>rad51 Δ::ura4<sup>+</sup> ura4-D18 leu1-32 his3-D1 ade6-L469/pUC8/his3<sup>+</sup>/BS nick site/ade6-M375</i>                | This study              |
| MCW3492 | <i>h</i> <sup>+</sup>    | <i>rad51 Δ::arg3<sup>+</sup> rqh1 Δ::kanMx6 ura4-D18 leu1-32 his3-D1 ade6-L469/pUC8/his3<sup>+</sup>/BS nick site/ade6-M375</i> | This study              |
| MCW3494 | <i>h</i> <sup>+</sup>    | <i>rad51 Δ::arg3<sup>+</sup> ura4-D18 leu1-32 his3-D1 ade6-L469/pUC8/his3<sup>+</sup>/BS nick site/ade6-M375</i>                | This study              |
| MCW3496 | <i>h</i> <sup>+</sup>    | <i>rad51 Δ::arg3<sup>+</sup> ura4-D18 leu1-32 his3-D1 ade6-L469/pUC8/his3<sup>+</sup>/BS nick site/ade6-M375</i>                | This study              |
| MCW429  | <i>h</i> <sup>+</sup>    | <i>ura4-D18 leu1-32 his3-D1 arg3-D4 ade6-L469/pUC8/his3<sup>+</sup>/ade6-M375</i>                                               | This study              |
| FO911   | <i>h</i> <sup>+</sup>    | <i>rqh1 Δ::kanMx6 ura4-D18 leu1-32 his3-D1 arg3-D4 ade6-L469/pUC8/his3<sup>+</sup>/ade6-M375</i>                                | This study              |
| FO949   | <i>h</i> <sup>+</sup>    | <i>exo1 Δ::ura4<sup>+</sup> ura4-D18 leu1-32 his3-D1 arg3-D4 ade6-L469/pUC8/his3<sup>+</sup>/ade6-M375</i>                      | This study              |
| FO1098  | <i>h</i>                 | <i>exo1 Δ::ura4<sup>+</sup> rqh1 Δ::kanMx6 ura4-D18 leu1-32 his3-D1</i>                                                         | This study              |

|         |                          |                                                                                                                                      |            |
|---------|--------------------------|--------------------------------------------------------------------------------------------------------------------------------------|------------|
|         |                          | <i>arg3-D4 ade6-L469/pUC8/his3<sup>+</sup>/ade6-M375</i>                                                                             |            |
| MCW4713 | <i>h<sup>+</sup></i>     | <i>ade6-M375 int::pUC8/his3<sup>+</sup>/RTS1-AO/ade6-L469 ura4-D18 his3-D1 leu1-32 arg3-D4</i>                                       | This study |
| FO1742  | <i>h<sup>+</sup></i>     | <i>exo1Δ::ura4<sup>+</sup> ade6-M375 int::pUC8/his3<sup>+</sup>/RTS1-AO/ade6-L469 ura4-D18 his3-D1 leu1-32 arg3-D4</i>               | This study |
| MCW1447 | <i>h<sup>+</sup></i>     | <i>rqh1Δ::kanMx6 ade6-M375 int::pUC8/his3<sup>+</sup>/RTS1-AO/ade6-L469 ura4-D18 his3-D1 leu1-32 arg3-D4</i>                         | This study |
| FO1762  | <i>h<sup>+</sup></i>     | <i>exo1Δ::ura4<sup>+</sup> rqh1Δ::kanMx6 ade6-M375 int::pUC8/his3<sup>+</sup>/RTS1-AO/ade6-L469 ura4-D18 his3-D1 leu1-32 arg3-D4</i> | This study |
| ALP649  | <i>h<sup>+</sup></i>     | wild type                                                                                                                            | Lab strain |
| ALP688  | <i>h<sup>-smt0</sup></i> | wild type                                                                                                                            | Lab strain |
| MCW3748 | <i>h<sup>+</sup></i>     | <i>exo1Δ::ura4<sup>+</sup> ura4-D18</i>                                                                                              | This study |
| MCW3749 | <i>h<sup>-smt0</sup></i> | <i>exo1Δ::ura4<sup>+</sup> ura4-D18</i>                                                                                              | This study |
| MCW3387 | <i>h<sup>+</sup></i>     | <i>rqh1Δ::kanMx6</i>                                                                                                                 | (2)        |
| MCW3388 | <i>h<sup>-smt0</sup></i> | <i>rqh1Δ::kanMx6</i>                                                                                                                 | (2)        |
| MCW4479 | <i>h<sup>+</sup></i>     | <i>exo1Δ::ura4<sup>+</sup> rqh1Δ::kanMx6 ura4-D18</i>                                                                                | This study |
| MCW4480 | <i>h<sup>-smt0</sup></i> | <i>exo1Δ::ura4<sup>+</sup> rqh1Δ::kanMx6 ura4-D18</i>                                                                                | This study |
| MCW3202 | <i>h<sup>+</sup></i>     | <i>ura4<sup>+</sup>-aim2 ade6-3083 ura4-D18 leu1-32 his3-D1</i>                                                                      | (3)        |
| MCW3200 | <i>h<sup>-smt0</sup></i> | <i>his3<sup>+</sup>-aim ade6-L469 ura4-D18 his3-D1 arg3-D4</i>                                                                       | (3)        |
| MCW4268 | <i>h<sup>-smt0</sup></i> | <i>exo1Δ::kanMX6 his3<sup>+</sup>-aim ade6-L469 ura4-D18 his3-D1 arg3-D4</i>                                                         | This study |
| MCW4269 | <i>h<sup>+</sup></i>     | <i>exo1Δ::kanMX6 ura4<sup>+</sup>-aim2 ade6-3083 ura4-D18 leu1-32 his3-D1</i>                                                        | This study |
| MCW3385 | <i>h<sup>+</sup></i>     | <i>rqh1Δ::kanMX6 ura4<sup>+</sup>-aim2 ade6-3083 ura4-D18 leu1-32 his3-D1</i>                                                        | (4)        |
| MCW3384 | <i>h<sup>-smt0</sup></i> | <i>rqh1Δ::kanMX6 his3<sup>+</sup>-aim ade6-L469 ura4-D18 his3-D1 arg3-D4</i>                                                         | (4)        |
| MCW4270 | <i>h<sup>-smt0</sup></i> | <i>exo1Δ::kanMX6 rqh1Δ::natMX6 his3<sup>+</sup>-aim ade6-L469 ura4-D18 his3-D1 arg3-D4</i>                                           | This study |
| MCW4271 | <i>h<sup>+</sup></i>     | <i>exo1Δ::kanMX6 rqh1Δ::natMX6 ura4<sup>+</sup>-aim2 ade6-3083 ura4-D18 leu1-32 his3-D1</i>                                          | This study |

<sup>a</sup> derived from ECS218/220, which were a gift from Shao-Win Wang

<sup>b</sup> derived from PB70 (1)

<sup>c</sup> derived from JZ108 (1)

1. Roseaulin, L., Yamada, Y., Tsutsui, Y., Russell, P., Iwasaki, H. and Arcangioli, B. (2008) Mus81 is essential for sister chromatid recombination at broken replication forks. *EMBO J.*, **27**, 1378-1387.

2. Lorenz, A., Osman, F., Sun, W., Nandi, S., Steinacher, R. and Whitby, M.C. (2012) The fission yeast FANCM ortholog directs non-crossover recombination during meiosis. *Science*, **336**, 1585–1588.

3. Lorenz, A., West, S.C. and Whitby, M.C. (2010) The human Holliday junction resolvase GEN1 rescues the meiotic phenotype of a *Schizosaccharomyces pombe* mus81 mutant. *Nucleic Acids Res.*, **38**, 1866–1873.

4. Lorenz, A., Mehats, A., Osman, F. and Whitby, M.C. (2014) Rad51/Dmc1 paralogs and mediators oppose DNA helicases to limit hybrid DNA formation and promote crossovers during meiotic recombination. *Nucleic Acids Res.*, **42**, 13723-13735.

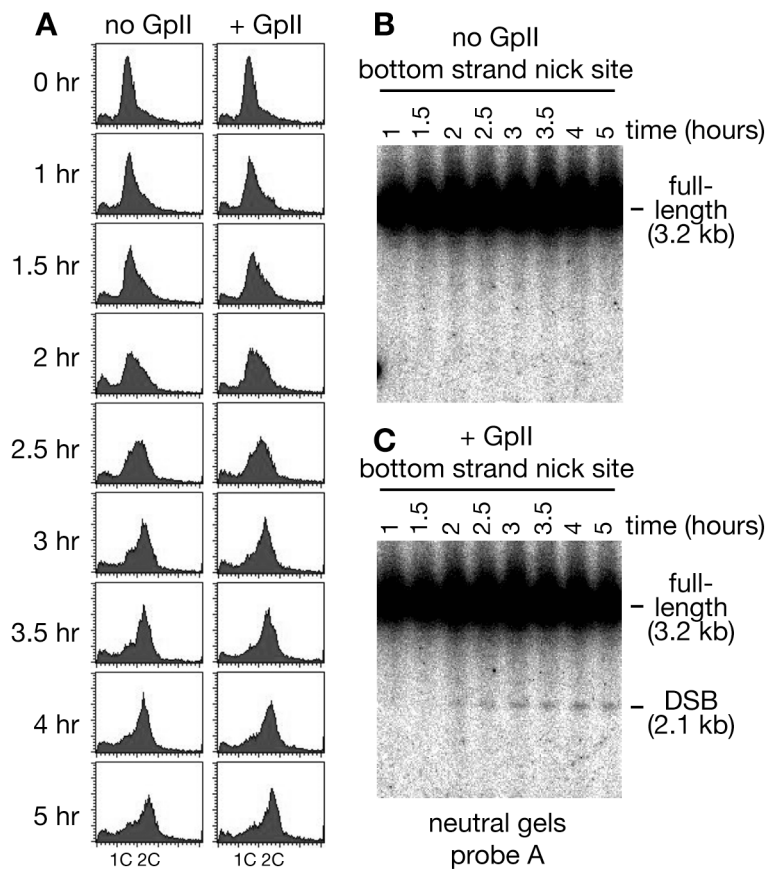

**Supplementary Figure S1. GpII nick-induced DSB formation depends on passage through S-phase.**

*rad50s cdc10-V50* cells, with the bottom strand nick site and containing either pREP1 or pREP1-NLS-gpII, were grown at 28°C for 20 hours in EMMG lacking histidine, leucine and thiamine to allow full de-repression of the *nmt* promoter, and therefore expression of NLS-gpII in cells containing pREP1-NLS-gpII. Cells were then transferred to fresh media and shifted to 34°C to arrest them in G1. After 4 hours the cells were switched back to 28°C and cell cycle progression and DSB formation monitored by flow cytometry (A) and neutral gel analysis (B and C), respectively. DNA was prepared in agarose plugs and digested with NdeI as in Figure 4C and D. Southern blots were probed with probe A (see Figure 4A).

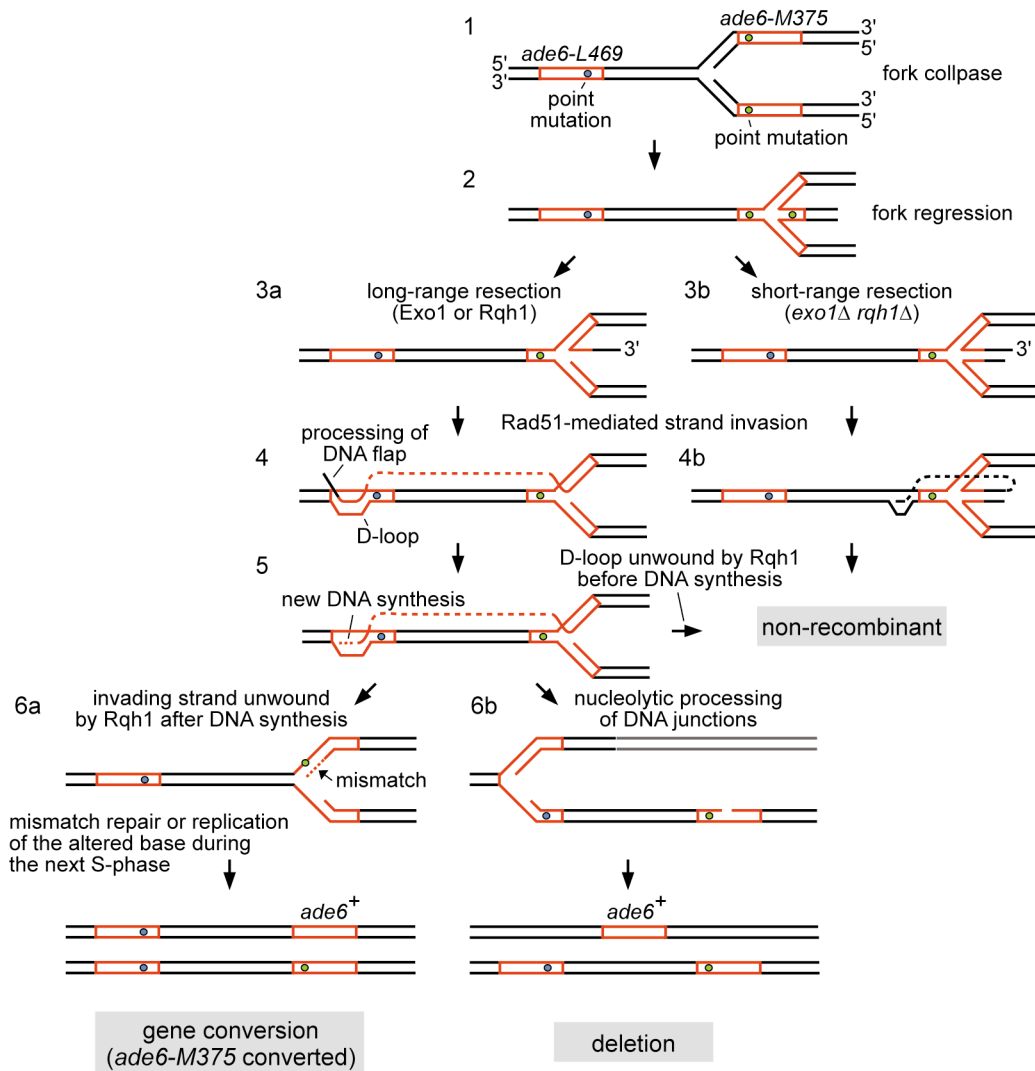

**Supplementary Figure S2. Hypothetical model for how Exo1 and Rqh1 could influence the frequency of direct repeat recombination following replication fork collapse.**

(1) Replication fork stalls and collapses between a direct repeat of *ade6* heteroalleles. (2) Replication fork regression exposes a double-stranded DNA end. (3a) Long-range resection of the DNA end, catalysed by Exo1 or Rqh1, results in a 3' single-stranded tail consisting of non-repeated DNA (in black) and *ade6* repeated DNA (in red). (4a) Rad51 loads on to the 3' DNA tail and catalyses a search for homologous DNA. As the 3' tail consists of *ade6* DNA, Rad51 can use this to locate either *ade6* allele. In the diagram, Rad51 is shown catalysing DNA pairing and strand invasion with the *ade6-L469* allele. (5) Strand invasion, followed by processing of the heterologous DNA flap, exposes a 3' end from which new DNA synthesis can be primed. If processing of the flap results in removal of the *ade6-M375* point mutation, then the new DNA synthesis will result in the invading strand carrying just wild-type *ade6* genetic information. However, if Rqh1 unwinds the D-loop prior to DNA synthesis, it will result in a non-recombinant. (6a) Rqh1 unwinds the D-loop after a DNA polymerase has extended the 3' end, which ultimately leads to gene conversion of the *ade6-M375* allele. (6b) Cleavage of the two DNA junction points, by a structure-specific nuclease, such as Mus81-Eme1, results in an *ade6*<sup>+</sup> deletion-type recombinant. (3b) In the absence of Exo1 and Rqh1, the DNA end is subject to only short-range resection, which exposes only non-repeated DNA. (4b) Rad51-mediated strand invasion occurs only at non-repeated DNA and, therefore, does not generate an *ade6*<sup>+</sup> recombinant.
